# Supplementary material
Source: Springer Nature journal article supplement (https://www.springermedizin.de/resource/supplementary/12967_2013_1713_MOESM4_ESM.pdf/9575054)

**A**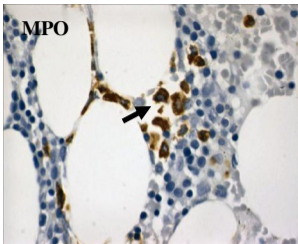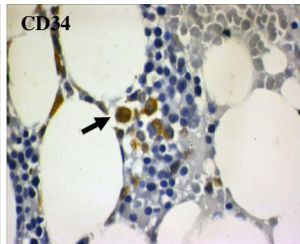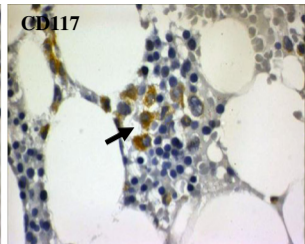**B**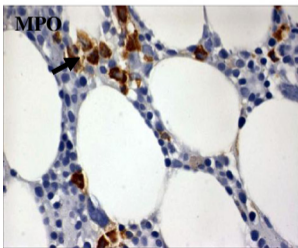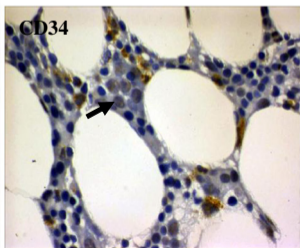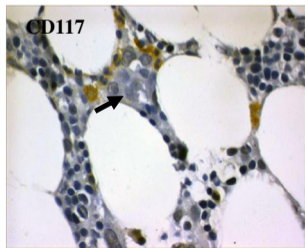

Supplement: MOESM4 [file 9575054]
